# Supplementary material
Source: publisher figshare collection journal article supplement (https://acs.figshare.com/ndownloader/files/4117162)
Supplement: Supplementary file 1 [file 4117162]

d
 
data_a 
 
_audit_creation_method            SHELXL-97 
_chemical_name_systematic 
; 
 ? 
; 
_chemical_name_common             ? 
_chemical_melting_point           ? 
_chemical_formula_moiety          'C15 H26 O3, H2 O' 
_chemical_formula_sum             'C15 H28 O4' 
_chemical_formula_weight          272.37 
 
loop_ 
 _atom_type_symbol 
 _atom_type_description 
 _atom_type_scat_dispersion_real 
 _atom_type_scat_dispersion_imag 
 _atom_type_scat_source 
 'C'  'C'   0.0181   0.0091 
 'International Tables Vol C Tables 4.2.6.8 and 6.1.1.4' 
 'H'  'H'   0.0000   0.0000 
 'International Tables Vol C Tables 4.2.6.8 and 6.1.1.4' 
 'O'  'O'   0.0492   0.0322 
 'International Tables Vol C Tables 4.2.6.8 and 6.1.1.4' 
 
_symmetry_cell_setting            orthorhombic
_symmetry_space_group_name_H-M    'P 21 21 21'
_chemical_absolute_configuration  ad
 

loop_
 _symmetry_equiv_pos_as_xyz 
 'x, y, z' 
 '-x+1/2, -y, z+1/2' 
 '-x, y+1/2, -z+1/2' 
 'x+1/2, -y+1/2, -z' 
 
_cell_length_a                    7.9289(2) 
_cell_length_b                    9.7894(2) 
_cell_length_c                    19.0738(4) 
_cell_angle_alpha                 90.00 
_cell_angle_beta                  90.00 
_cell_angle_gamma                 90.00 
_cell_volume                      1480.49(6) 
_cell_formula_units_Z             4 
_cell_measurement_temperature     100(2) 
_cell_measurement_reflns_used     2391
_cell_measurement_theta_min       4.51
_cell_measurement_theta_max       74.06

_exptl_crystal_description        prism
_exptl_crystal_colour             colorless
_exptl_crystal_size_max           0.20 
_exptl_crystal_size_mid           0.15 
_exptl_crystal_size_min           0.05 
_exptl_crystal_density_meas       ? 
_exptl_crystal_density_diffrn     1.222 
_exptl_crystal_density_method     'not measured' 
_exptl_crystal_F_000              600 
_exptl_absorpt_coefficient_mu     0.698 
_exptl_absorpt_correction_T_min   0.8730 
_exptl_absorpt_correction_T_max   0.9659 
_exptl_absorpt_correction_type      multi-scan
_exptl_absorpt_process_details    'CrysAlis PRO (Agilent, 2010)'
 
_diffrn_ambient_temperature       100(2) 
_diffrn_radiation_wavelength      1.54184 
_diffrn_radiation_type            CuK\a 
_diffrn_radiation_source          'SuperNova (Cu) X-ray Source'
_diffrn_radiation_monochromator   Mirror
_diffrn_measurement_device_type   
'Agilent Technologies SuperNova Dual diffractometer with Atlas detector'
_diffrn_detector_area_resol_mean  10.4041
_diffrn_measurement_method        '\w scan'
_diffrn_standards_number          0
_diffrn_standards_interval_count  0 
_diffrn_standards_interval_time   0
_diffrn_standards_decay_%         0
_diffrn_reflns_number             4271 
_diffrn_reflns_av_R_equivalents   0.0230 
_diffrn_reflns_av_sigmaI/netI     0.0384 
_diffrn_reflns_limit_h_min        -9 
_diffrn_reflns_limit_h_max        9 
_diffrn_reflns_limit_k_min        -11 
_diffrn_reflns_limit_k_max        8 
_diffrn_reflns_limit_l_min        -14 
_diffrn_reflns_limit_l_max        23 
_diffrn_reflns_theta_min          5.08 
_diffrn_reflns_theta_max          74.23 
_reflns_number_total              2851 
_reflns_number_gt                 2651 
_reflns_threshold_expression      I>2\s(I) 
 
_computing_data_collection        'CrysAlis PRO (Agilent, 2010)'
_computing_cell_refinement        'CrysAlis PRO (Agilent, 2010)'
_computing_data_reduction         'CrysAlis PRO (Agilent, 2010)'
_computing_structure_solution     'SHELXS-97 (Sheldrick, 2008)' 
_computing_structure_refinement   'SHELXL-97 (Sheldrick, 2008)' 
_computing_molecular_graphics     'X-Seed (Barbour, 2001)'
_computing_publication_material   'publCIF (Westrip, 2010)'
 
 _refine_ls_structure_factor_coef  Fsqd  
_refine_ls_matrix_type            full 
_refine_ls_weighting_scheme       calc  
_refine_ls_weighting_details 
 'calc w=1/[\s^2^(Fo^2^)+(0.0686P)^2^+0.3179P] where P=(Fo^2^+2Fc^2^)/3' 
_atom_sites_solution_primary      direct 
_atom_sites_solution_secondary    difmap 
_atom_sites_solution_hydrogens    geom 
_refine_ls_hydrogen_treatment     mixed 
_refine_ls_extinction_method      none 
_refine_ls_extinction_coef        ? 
_refine_ls_abs_structure_details
'Flack (Flack, 1983) from 1853 Friedel pairs'
_refine_ls_abs_structure_Flack    0.1(2) 
_refine_ls_number_reflns          2851 
_refine_ls_number_parameters      188 
_refine_ls_number_restraints      4 
_refine_ls_R_factor_all           0.0459 
_refine_ls_R_factor_gt            0.0419 
_refine_ls_wR_factor_ref          0.1158 
_refine_ls_wR_factor_gt           0.1106 
_refine_ls_goodness_of_fit_ref    1.039 
_refine_ls_restrained_S_all       1.038 
_refine_ls_shift/su_max           0.001 
_refine_ls_shift/su_mean          0.001 
 
loop_ 
 _atom_site_label 
 _atom_site_type_symbol 
 _atom_site_fract_x 
 _atom_site_fract_y 
 _atom_site_fract_z 
 _atom_site_U_iso_or_equiv 
 _atom_site_adp_type 
 _atom_site_occupancy 
 _atom_site_symmetry_multiplicity 
 _atom_site_calc_flag 
 _atom_site_refinement_flags 
 _atom_site_disorder_assembly 
 _atom_site_disorder_group 
O1 O 1.14765(18) 0.05675(18) 0.25061(7) 0.0257(4) Uani 1 1 d . . . 
O2 O 1.05666(18) -0.10094(15) 0.49709(7) 0.0208(3) Uani 1 1 d D . . 
O3 O 0.57391(18) -0.12097(15) 0.53221(7) 0.0187(3) Uani 1 1 d D . . 
O1W O 1.22308(19) 0.0703(2) 0.10438(7) 0.0268(4) Uani 1 1 d D . . 
C1 C 1.0299(2) -0.0141(2) 0.27039(10) 0.0178(4) Uani 1 1 d . . . 
C2 C 0.9050(2) -0.0773(2) 0.22111(10) 0.0187(4) Uani 1 1 d . . . 
H2A H 0.9154 -0.1780 0.2236 0.022 Uiso 1 1 calc R . . 
H2B H 0.9323 -0.0490 0.1726 0.022 Uiso 1 1 calc R . . 
C3 C 0.7209(2) -0.03658(19) 0.23771(9) 0.0150(4) Uani 1 1 d . . . 
C4 C 0.6890(2) -0.06208(19) 0.31742(9) 0.0130(4) Uani 1 1 d . . . 
H4 H 0.7011 -0.1630 0.3236 0.016 Uiso 1 1 calc R . . 
C5 C 0.8189(2) 0.00152(19) 0.36910(9) 0.0137(4) Uani 1 1 d . . . 
C6 C 0.9987(2) -0.0437(2) 0.34714(10) 0.0192(4) Uani 1 1 d . . . 
H6A H 1.0831 0.0055 0.3759 0.023 Uiso 1 1 calc R . . 
H6B H 1.0121 -0.1428 0.3559 0.023 Uiso 1 1 calc R . . 
C7 C 0.8179(3) 0.1596(2) 0.36848(10) 0.0209(4) Uani 1 1 d . . . 
H7A H 0.7064 0.1927 0.3827 0.031 Uiso 1 1 calc R . . 
H7B H 0.8435 0.1923 0.3211 0.031 Uiso 1 1 calc R . . 
H7C H 0.9032 0.1938 0.4012 0.031 Uiso 1 1 calc R . . 
C8 C 0.6090(3) -0.1326(2) 0.19417(10) 0.0225(4) Uani 1 1 d . . . 
H8A H 0.6262 -0.1143 0.1442 0.034 Uiso 1 1 calc R . . 
H8B H 0.4904 -0.1172 0.2062 0.034 Uiso 1 1 calc R . . 
H8C H 0.6391 -0.2277 0.2044 0.034 Uiso 1 1 calc R . . 
C9 C 0.6877(3) 0.1094(2) 0.21217(10) 0.0210(4) Uani 1 1 d . . . 
H9A H 0.7566 0.1735 0.2393 0.032 Uiso 1 1 calc R . . 
H9B H 0.5681 0.1315 0.2185 0.032 Uiso 1 1 calc R . . 
H9C H 0.7171 0.1166 0.1624 0.032 Uiso 1 1 calc R . . 
C10 C 0.5085(2) -0.0301(2) 0.34073(10) 0.0175(4) Uani 1 1 d . . . 
H10A H 0.4277 -0.0687 0.3065 0.021 Uiso 1 1 calc R . . 
H10B H 0.4919 0.0701 0.3422 0.021 Uiso 1 1 calc R . . 
C11 C 0.4745(2) -0.0907(2) 0.41350(10) 0.0186(4) Uani 1 1 d . . . 
H11A H 0.3581 -0.0673 0.4279 0.022 Uiso 1 1 calc R . . 
H11B H 0.4825 -0.1915 0.4107 0.022 Uiso 1 1 calc R . . 
C12 C 0.5971(2) -0.0394(2) 0.46916(10) 0.0169(4) Uani 1 1 d . . . 
C13 C 0.7825(2) -0.05936(19) 0.44370(9) 0.0139(4) Uani 1 1 d . . . 
H13 H 0.7964 -0.1603 0.4382 0.017 Uiso 1 1 calc R . . 
C14 C 0.5537(3) 0.1056(2) 0.49285(11) 0.0241(5) Uani 1 1 d . . . 
H14A H 0.4344 0.1099 0.5062 0.036 Uiso 1 1 calc R . . 
H14B H 0.5750 0.1696 0.4543 0.036 Uiso 1 1 calc R . . 
H14C H 0.6238 0.1303 0.5332 0.036 Uiso 1 1 calc R . . 
C15 C 0.9077(2) -0.0188(2) 0.50096(10) 0.0177(4) Uani 1 1 d . . . 
H15A H 0.9383 0.0787 0.4955 0.021 Uiso 1 1 calc R . . 
H15B H 0.8544 -0.0304 0.5475 0.021 Uiso 1 1 calc R . . 
H2 H 1.118(3) -0.086(4) 0.5320(11) 0.048(9) Uiso 1 1 d D . . 
H3 H 0.567(3) -0.2046(12) 0.5230(13) 0.027(7) Uiso 1 1 d D . . 
H11 H 1.211(4) 0.062(3) 0.1477(6) 0.039(8) Uiso 1 1 d D . . 
H12 H 1.131(2) 0.077(3) 0.0829(12) 0.030(7) Uiso 1 1 d D . . 
 
loop_ 
 _atom_site_aniso_label 
 _atom_site_aniso_U_11 
 _atom_site_aniso_U_22 
 _atom_site_aniso_U_33 
 _atom_site_aniso_U_23 
 _atom_site_aniso_U_13 
 _atom_site_aniso_U_12 
O1 0.0177(7) 0.0427(10) 0.0166(6) 0.0034(7) 0.0026(6) -0.0050(7) 
O2 0.0179(7) 0.0278(8) 0.0168(6) -0.0006(6) -0.0057(5) 0.0013(6) 
O3 0.0218(7) 0.0220(7) 0.0124(6) 0.0026(6) 0.0038(5) -0.0002(6) 
O1W 0.0158(7) 0.0499(10) 0.0146(7) 0.0042(7) 0.0002(5) -0.0020(7) 
C1 0.0128(9) 0.0256(10) 0.0149(9) 0.0006(8) 0.0031(7) 0.0037(8) 
C2 0.0211(10) 0.0219(10) 0.0131(8) -0.0005(8) 0.0024(7) -0.0009(8) 
C3 0.0182(9) 0.0157(9) 0.0111(8) -0.0002(7) 0.0004(7) -0.0007(7) 
C4 0.0136(8) 0.0130(8) 0.0124(8) 0.0007(7) 0.0002(7) -0.0004(7) 
C5 0.0136(8) 0.0162(9) 0.0112(8) -0.0007(7) 0.0001(7) -0.0014(7) 
C6 0.0148(9) 0.0302(11) 0.0125(9) 0.0019(8) 0.0001(7) 0.0009(8) 
C7 0.0310(11) 0.0165(9) 0.0151(9) -0.0012(8) 0.0010(8) -0.0074(9) 
C8 0.0250(10) 0.0269(11) 0.0157(9) -0.0003(8) -0.0014(8) -0.0070(9) 
C9 0.0300(11) 0.0187(10) 0.0145(9) 0.0027(8) 0.0005(8) 0.0030(9) 
C10 0.0135(9) 0.0247(10) 0.0143(8) 0.0037(8) 0.0011(7) 0.0021(7) 
C11 0.0139(9) 0.0253(10) 0.0164(9) 0.0032(8) 0.0024(7) 0.0002(8) 
C12 0.0184(9) 0.0195(10) 0.0129(8) 0.0013(8) 0.0043(7) 0.0004(8) 
C13 0.0140(9) 0.0171(9) 0.0105(8) -0.0015(7) 0.0013(7) -0.0001(7) 
C14 0.0283(11) 0.0222(10) 0.0216(10) -0.0009(8) 0.0099(8) 0.0037(8) 
C15 0.0178(9) 0.0207(9) 0.0145(8) -0.0013(8) 0.0006(7) -0.0011(8) 
 
loop_ 
 _geom_bond_atom_site_label_1 
 _geom_bond_atom_site_label_2 
 _geom_bond_distance 
 _geom_bond_site_symmetry_2 
 _geom_bond_publ_flag 
O1 C1 1.223(3) . ? 
O2 C15 1.431(2) . ? 
O2 H2 0.837(10) . ? 
O3 C12 1.455(2) . ? 
O3 H3 0.839(10) . ? 
O1W H11 0.836(10) . ? 
O1W H12 0.841(10) . ? 
C1 C2 1.499(3) . ? 
C1 C6 1.512(2) . ? 
C2 C3 1.545(3) . ? 
C2 H2A 0.9900 . ? 
C2 H2B 0.9900 . ? 
C3 C9 1.533(3) . ? 
C3 C8 1.537(3) . ? 
C3 C4 1.561(2) . ? 
C4 C10 1.531(2) . ? 
C4 C5 1.555(2) . ? 
C4 H4 1.0000 . ? 
C5 C7 1.547(3) . ? 
C5 C6 1.550(3) . ? 
C5 C13 1.569(2) . ? 
C6 H6A 0.9900 . ? 
C6 H6B 0.9900 . ? 
C7 H7A 0.9800 . ? 
C7 H7B 0.9800 . ? 
C7 H7C 0.9800 . ? 
C8 H8A 0.9800 . ? 
C8 H8B 0.9800 . ? 
C8 H8C 0.9800 . ? 
C9 H9A 0.9800 . ? 
C9 H9B 0.9800 . ? 
C9 H9C 0.9800 . ? 
C10 C11 1.533(3) . ? 
C10 H10A 0.9900 . ? 
C10 H10B 0.9900 . ? 
C11 C12 1.525(3) . ? 
C11 H11A 0.9900 . ? 
C11 H11B 0.9900 . ? 
C12 C14 1.530(3) . ? 
C12 C13 1.560(2) . ? 
C13 C15 1.528(2) . ? 
C13 H13 1.0000 . ? 
C14 H14A 0.9800 . ? 
C14 H14B 0.9800 . ? 
C14 H14C 0.9800 . ? 
C15 H15A 0.9900 . ? 
C15 H15B 0.9900 . ? 
 
loop_ 
 _geom_angle_atom_site_label_1 
 _geom_angle_atom_site_label_2 
 _geom_angle_atom_site_label_3 
 _geom_angle 
 _geom_angle_site_symmetry_1 
 _geom_angle_site_symmetry_3 
 _geom_angle_publ_flag 
C15 O2 H2 110(2) . . ? 
C12 O3 H3 111.7(18) . . ? 
H11 O1W H12 113(3) . . ? 
O1 C1 C2 123.03(17) . . ? 
O1 C1 C6 122.14(18) . . ? 
C2 C1 C6 114.83(17) . . ? 
C1 C2 C3 112.88(16) . . ? 
C1 C2 H2A 109.0 . . ? 
C3 C2 H2A 109.0 . . ? 
C1 C2 H2B 109.0 . . ? 
C3 C2 H2B 109.0 . . ? 
H2A C2 H2B 107.8 . . ? 
C9 C3 C8 107.42(16) . . ? 
C9 C3 C2 109.76(16) . . ? 
C8 C3 C2 106.05(15) . . ? 
C9 C3 C4 115.51(15) . . ? 
C8 C3 C4 109.57(15) . . ? 
C2 C3 C4 108.12(15) . . ? 
C10 C4 C5 110.65(15) . . ? 
C10 C4 C3 113.66(15) . . ? 
C5 C4 C3 116.48(15) . . ? 
C10 C4 H4 104.9 . . ? 
C5 C4 H4 104.9 . . ? 
C3 C4 H4 104.9 . . ? 
C7 C5 C6 106.73(17) . . ? 
C7 C5 C4 113.09(16) . . ? 
C6 C5 C4 108.85(15) . . ? 
C7 C5 C13 112.69(15) . . ? 
C6 C5 C13 107.79(15) . . ? 
C4 C5 C13 107.51(14) . . ? 
C1 C6 C5 110.94(16) . . ? 
C1 C6 H6A 109.5 . . ? 
C5 C6 H6A 109.5 . . ? 
C1 C6 H6B 109.5 . . ? 
C5 C6 H6B 109.5 . . ? 
H6A C6 H6B 108.0 . . ? 
C5 C7 H7A 109.5 . . ? 
C5 C7 H7B 109.5 . . ? 
H7A C7 H7B 109.5 . . ? 
C5 C7 H7C 109.5 . . ? 
H7A C7 H7C 109.5 . . ? 
H7B C7 H7C 109.5 . . ? 
C3 C8 H8A 109.5 . . ? 
C3 C8 H8B 109.5 . . ? 
H8A C8 H8B 109.5 . . ? 
C3 C8 H8C 109.5 . . ? 
H8A C8 H8C 109.5 . . ? 
H8B C8 H8C 109.5 . . ? 
C3 C9 H9A 109.5 . . ? 
C3 C9 H9B 109.5 . . ? 
H9A C9 H9B 109.5 . . ? 
C3 C9 H9C 109.5 . . ? 
H9A C9 H9C 109.5 . . ? 
H9B C9 H9C 109.5 . . ? 
C4 C10 C11 110.36(15) . . ? 
C4 C10 H10A 109.6 . . ? 
C11 C10 H10A 109.6 . . ? 
C4 C10 H10B 109.6 . . ? 
C11 C10 H10B 109.6 . . ? 
H10A C10 H10B 108.1 . . ? 
C12 C11 C10 113.00(16) . . ? 
C12 C11 H11A 109.0 . . ? 
C10 C11 H11A 109.0 . . ? 
C12 C11 H11B 109.0 . . ? 
C10 C11 H11B 109.0 . . ? 
H11A C11 H11B 107.8 . . ? 
O3 C12 C11 108.31(15) . . ? 
O3 C12 C14 103.69(15) . . ? 
C11 C12 C14 111.57(17) . . ? 
O3 C12 C13 107.94(15) . . ? 
C11 C12 C13 110.04(14) . . ? 
C14 C12 C13 114.84(16) . . ? 
C15 C13 C12 110.91(15) . . ? 
C15 C13 C5 115.46(15) . . ? 
C12 C13 C5 114.07(15) . . ? 
C15 C13 H13 105.1 . . ? 
C12 C13 H13 105.1 . . ? 
C5 C13 H13 105.1 . . ? 
C12 C14 H14A 109.5 . . ? 
C12 C14 H14B 109.5 . . ? 
H14A C14 H14B 109.5 . . ? 
C12 C14 H14C 109.5 . . ? 
H14A C14 H14C 109.5 . . ? 
H14B C14 H14C 109.5 . . ? 
O2 C15 C13 110.69(15) . . ? 
O2 C15 H15A 109.5 . . ? 
C13 C15 H15A 109.5 . . ? 
O2 C15 H15B 109.5 . . ? 
C13 C15 H15B 109.5 . . ? 
H15A C15 H15B 108.1 . . ? 
 
loop_ 
 _geom_torsion_atom_site_label_1 
 _geom_torsion_atom_site_label_2 
 _geom_torsion_atom_site_label_3 
 _geom_torsion_atom_site_label_4 
 _geom_torsion 
 _geom_torsion_site_symmetry_1 
 _geom_torsion_site_symmetry_2 
 _geom_torsion_site_symmetry_3 
 _geom_torsion_site_symmetry_4 
 _geom_torsion_publ_flag 
O1 C1 C2 C3 -123.4(2) . . . . ? 
C6 C1 C2 C3 56.1(2) . . . . ? 
C1 C2 C3 C9 76.4(2) . . . . ? 
C1 C2 C3 C8 -167.81(16) . . . . ? 
C1 C2 C3 C4 -50.4(2) . . . . ? 
C9 C3 C4 C10 58.5(2) . . . . ? 
C8 C3 C4 C10 -63.0(2) . . . . ? 
C2 C3 C4 C10 -178.14(16) . . . . ? 
C9 C3 C4 C5 -72.0(2) . . . . ? 
C8 C3 C4 C5 166.58(16) . . . . ? 
C2 C3 C4 C5 51.4(2) . . . . ? 
C10 C4 C5 C7 -66.3(2) . . . . ? 
C3 C4 C5 C7 65.5(2) . . . . ? 
C10 C4 C5 C6 175.22(15) . . . . ? 
C3 C4 C5 C6 -52.9(2) . . . . ? 
C10 C4 C5 C13 58.71(19) . . . . ? 
C3 C4 C5 C13 -169.45(15) . . . . ? 
O1 C1 C6 C5 123.2(2) . . . . ? 
C2 C1 C6 C5 -56.3(2) . . . . ? 
C7 C5 C6 C1 -70.4(2) . . . . ? 
C4 C5 C6 C1 52.0(2) . . . . ? 
C13 C5 C6 C1 168.34(16) . . . . ? 
C5 C4 C10 C11 -61.0(2) . . . . ? 
C3 C4 C10 C11 165.70(16) . . . . ? 
C4 C10 C11 C12 57.6(2) . . . . ? 
C10 C11 C12 O3 -169.74(15) . . . . ? 
C10 C11 C12 C14 76.7(2) . . . . ? 
C10 C11 C12 C13 -52.0(2) . . . . ? 
O3 C12 C13 C15 -57.63(19) . . . . ? 
C11 C12 C13 C15 -175.65(16) . . . . ? 
C14 C12 C13 C15 57.5(2) . . . . ? 
O3 C12 C13 C5 169.94(15) . . . . ? 
C11 C12 C13 C5 51.9(2) . . . . ? 
C14 C12 C13 C5 -75.0(2) . . . . ? 
C7 C5 C13 C15 -60.0(2) . . . . ? 
C6 C5 C13 C15 57.5(2) . . . . ? 
C4 C5 C13 C15 174.74(15) . . . . ? 
C7 C5 C13 C12 70.3(2) . . . . ? 
C6 C5 C13 C12 -172.24(15) . . . . ? 
C4 C5 C13 C12 -55.04(19) . . . . ? 
C12 C13 C15 O2 147.60(16) . . . . ? 
C5 C13 C15 O2 -80.67(19) . . . . ? 
 
loop_ 
 _geom_hbond_atom_site_label_D 
 _geom_hbond_atom_site_label_H 
 _geom_hbond_atom_site_label_A 
 _geom_hbond_distance_DH 
 _geom_hbond_distance_HA 
 _geom_hbond_distance_DA 
 _geom_hbond_angle_DHA 
 _geom_hbond_site_symmetry_A 
O2 H2 O1w  0.84(1) 1.88(1) 2.707(2) 172(3) 2_755 
O3 H3 O2   0.84(1) 1.94(1) 2.782(2) 179(3) 4_446 
O1w H11 O1 0.84(1) 2.03(1) 2.856(2) 171(3) . 
O1w H12 O3 0.84(1) 1.94(1) 2.772(2) 171(3) 2_654 
 
_diffrn_measured_fraction_theta_max    0.970 
_diffrn_reflns_theta_full              74.23 
_diffrn_measured_fraction_theta_full   0.970 
_refine_diff_density_max    0.338 
_refine_diff_density_min   -0.269 
_refine_diff_density_rms    0.050 
#===============================================================================
